1  
2  
3  
4  
5  
6  
7  
8  
9  
10  
11  
12  
13  
14  
15  
16  
17  
18  
19  
20  
21  
22  
23  
24  
25  
26  
27  
28  
29  
30  
31  
32

## Croup during the COVID-19 Omicron Variant Surge

Emine M. Tunç, MD,<sup>a</sup> Cassandra Koid Jia Shin, MB BCh BAO,<sup>a</sup> Etiowo Usoro, MHI,<sup>b</sup>  
Siobhan E. Thomas-Smith, MD,<sup>a</sup> Indi Trehan, MD, MPH, DTM&H,<sup>a</sup>  
Russell T. Migita, MD,<sup>a</sup> Ashley E. Keilman, MD<sup>a</sup>

**Affiliations:** <sup>a</sup> Division of Pediatric Emergency Medicine, University of Washington, Seattle, Washington; and <sup>b</sup>Seattle Children’s Enterprise Analytics, Seattle Children’s Hospital, Seattle, Washington

**Address correspondence to:**

Ashley Keilman, MD  
ashley.keilman@seattlechildrens.org  
Division of Pediatric Emergency Medicine  
4800 Sand Point Way NE, M/S MB.7.520, Seattle, WA 98105

**Short title:** Croup During the COVID-19 Omicron Surge

**Conflict of interest disclosures:** None.

**Funding support:** None.

**Abbreviations:**

COVID-19: coronavirus disease 2019  
ED: Emergency Department  
PCR: polymerase chain reaction  
SARS-CoV-2: severe acute respiratory syndrome coronavirus 2

33 **Contributors' Statement Page**

34

35 Drs. Tunç, Koid Jia Shin, and Siobhan-Thomas conceptualized and designed the study, drafted  
36 the manuscript, and revised the manuscript for important intellectual content.

37

38 Mr. Usoro and Dr. Trehan conceptualized and designed the study, performed data acquisition,  
39 analysis, and interpretation, drafted the manuscript, revised the manuscript for important  
40 intellectual content, and take responsibility for the integrity of the data and the accuracy of the  
41 data analysis.

42

43 Drs. Migita and Keilman provided administrative support, conceptualized and designed the  
44 study, drafted the manuscript, and revised the manuscript for important intellectual content.

45

46 All authors approved the final manuscript as submitted.

## 47 **Introduction**

48 Croup (viral laryngotracheitis) is a common childhood upper respiratory disease, usually  
49 associated with parainfluenza or other endemic viruses, including seasonal coronavirus.<sup>1</sup> The  
50 infection results in varying degrees of inspiratory stridor, hoarse voice, barking cough, and  
51 respiratory distress up to and including complete airway obstruction. Sporadic case reports have  
52 suggested an association between SARS-CoV-2 and croup.<sup>2-9</sup> *Ex vivo* studies suggest that the  
53 Omicron variant (B.1.1.529) of SARS-CoV-2 replicates more rapidly in higher airways than  
54 previous lineages, suggesting the possibility of an increased risk for croup.<sup>10</sup> Here we merge  
55 epidemiologic and clinical data to evaluate whether there is indeed a high rate of croup as a  
56 manifestation of COVID-19, specifically with the Omicron variant.

57

## 58 **Methods**

59 High-level data was retrospectively extracted from patient charts among those seen in the  
60 Emergency Department (ED) at Seattle Children's Hospital, an academic, quaternary-care  
61 hospital with more than 50,000 annual ED visits prior to the COVID-19 pandemic. Inclusion  
62 criteria were patients who were assigned a diagnosis containing the word "croup" during either  
63 5/30/2021-11/30/2021, a time period correlating with predominance of the SARS-CoV-2 Delta  
64 variant (B.1.617.2), or during 12/1/2021-1/15/2022, corresponding to the initial phase of the  
65 Omicron variant surge.

66

67 Qualitative SARS-CoV-2 polymerase chain reaction (PCR) testing from nasopharyngeal or mid-  
68 turbinate swabs were obtained at the discretion of the treating clinician, as were interventions  
69 including racemic epinephrine and hospitalization. Contemporaneous publicly available local  
70 data on the proportion of SARS-CoV-2 samples in surrounding King County, Washington, with  
71 spike gene target failure on TaqPath PCR assays was used as a proxy for the proportion of  
72 infections caused by the Delta and Omicron SARS-CoV-2 variants  
73 (<https://depts.washington.edu/labmed/covid19/#sequencing-information>). This study was  
74 approved by the Seattle Children’s Hospital Institutional Review Board.

75

## 76 **Results**

77 A total of 401 patients were diagnosed with croup during the Delta surge and 107 patients were  
78 diagnosed with croup during the Omicron surge. Patients with croup who presented during the  
79 Omicron surge were more likely to test positive for COVID-19 (48.2% vs 2.8%,  $p < 0.0001$ ,  
80 odds ratio 31.8) (**Table 1**). The rate of viral respiratory testing remained similar during both time  
81 periods. Children with a clinical diagnosis of croup during the Omicron surge were more likely  
82 to be administered racemic epinephrine as part of their care (21.5% vs 13.0%,  $p = 0.032$ ). There  
83 were no differences in presenting age, rate of admission, rate of return to the ED within 72 hours,  
84 or admission among those who returned within 72 hours.

85 Using the local community prevalence of spike gene target failure as a proxy for the Omicron  
86 variant, the incidence of croup double compared to the rate in prior months, while at the same  
87 time the number of cases of parainfluenza virus identified decreased (**Figure 1**).

88

## 89 **Discussion**

90

91 We have identified a sharp rise in cases of croup seen in our pediatric ED in parallel with the  
92 replacement of the SARS-CoV-2 Delta variant by Omicron as the dominant variant in our  
93 community. This increase was not temporally associated with the circulation of parainfluenza  
94 virus, and indeed Omicron replaced parainfluenza as the predominant virus associated with  
95 croup during this time. Viral testing is not routinely recommended for patients with croup;  
96 testing that was performed was for a wide variety of patients and indications, but we do believe  
97 our data is a reasonable proxy for local population prevalence. The end of the study period  
98 coincided with a decrease in hospital testing capacity and thus we were not able to see if this  
99 trend continued with as much precision.

100

101 Croup patients during the Omicron surge were more likely to receive racemic epinephrine,  
102 suggesting a more severe initial clinical presentation. Based on admission rates and return visits,  
103 there is not enough data to alter current management after ED discharge.

104

105 Croup is one of the most severe manifestations of upper respiratory infections in children. As a  
106 common reason for ED visits, croup places a significant resource burden on health care systems.  
107 It appropriately generates tremendous fear and anxiety among children and their caretakers. As  
108 has been seen repeatedly during the COVID-19 pandemic, the protean clinical manifestations of  
109 SARS-CoV-2 have frequently humbled health care providers, with croup now needing to be

110 recognized as a common presentation of the Omicron variant, and possibly future variants as  
111 well.

112

113 **Acknowledgments:** We thank Pavitra Roychoudhury, PhD, Department of Laboratory Medicine  
114 and Pathology, University of Washington, for her help in accessing local SARS-CoV-2  
115 surveillance data.

116 **References**

- 117 1. Sung JY, Lee HJ, Eun BW, Kim SH, Lee SY, Lee JY, et al. Role of human coronavirus  
118 NL63 in hospitalized children with croup. *Pediatr Infect Dis J.* 2010;29:822-826.
- 119 2. Brackel CLH, Rutjes NW, Kuijpers TW, Terheggen-Lagro SWJ. SARS-CoV-2 and croup, a  
120 rare relationship or coincidence? *Am J Emerg Med.* 2021;49:410-411.
- 121 3. Kaur R, Schulz S, Fuji N, Pichichero M. COVID-19 pandemic impact on respiratory  
122 infectious diseases in primary care practice in children. *Front Pediatr.* 2021;9:722483.
- 123 4. Lim CC, Saniasiaya J, Kulasegarah J. Croup and COVID-19 in a child: A case report and  
124 literature review. *BMJ Case Rep.* 2021;14.
- 125 5. Peterson K, Patel J, Collier C, Chan SB. SARS-CoV-2 and croup, not a rare coincidence. *Am*  
126 *J Emerg Med.* 2021;doi:10.1016/j.ajem.2021.12.023.
- 127 6. Pitstick CE, Rodriguez KM, Smith AC, Herman HK, Hays JF, Nash CB. A curious case of  
128 croup: Laryngotracheitis caused by COVID-19. *Pediatrics.* 2021;147:e2020012179.
- 129 7. Tsoi K, Chan KC, Chan L, Mok G, Li AM, Lam HS. A child with SARS-CoV2-induced  
130 croup. *Pediatr Pulmonol.* 2021;56:2377-2378.
- 131 8. Venn AMR, Schmidt JM, Mullan PC. Pediatric croup with COVID-19. *Am J Emerg Med.*  
132 2021;43:287.e1-287.e3.
- 133 9. Zuccarelli AM, Leonard CG, Hampton SM. Laryngotracheobronchitis, croup, an unusual  
134 presentation of SARS-CoV-2. *Ulster Med J.* 2022;91:57-58.
- 135 10. Chan MCW, Hui KPY, Ho J, Cheung M, Ng K, Ching R, et al. SARS-CoV-2 omicron  
136 variant replication in human respiratory tract ex vivo. *Nature Portfolio.*  
137 2021;doi:10.21203/rs.3.rs-1189219/v1.

138 **Figure 1:** Number of patients diagnosed with croup, number of patients diagnosed with  
139 parainfluenza, and community prevalence of spike gene target failure for SARS-CoV-2.



**Table 1. Characteristics of croup patients during two different phases of the COVID-19 pandemic.**

| Characteristic                      | COVID Phase                         |                                       | p-value <sup>c</sup> | Odds ratio (95% CI) |
|-------------------------------------|-------------------------------------|---------------------------------------|----------------------|---------------------|
|                                     | Delta Surge <sup>a</sup><br>N = 401 | Omicron Surge <sup>b</sup><br>N = 107 |                      |                     |
| Age, median (IQR), yr               | 2.33 (1.42, 3.83)                   | 2.25 (1.08, 3.62)                     | 0.29                 |                     |
| SARS-CoV-2 status, n (%)            |                                     |                                       |                      |                     |
| Detected                            | 6 (2.8%)                            | 27 (48.2%)                            | < 0.0001             | 31.8 (12.7-80.2)    |
| Not detected                        | 205 (97.2%)                         | 29 (51.8%)                            |                      |                     |
| Not tested                          | 190                                 | 51                                    |                      |                     |
| Received racemic epinephrine, n (%) | 52 (13.0%)                          | 23 (21.5%)                            | 0.032                | 1.84 (1.06-3.18)    |
| Admitted to hospital, n (%)         | 15 (3.7%)                           | 4 (3.7%)                              | > 0.99               | 1.00 (0.35-2.85)    |
| 72-hr return to ED, n (%)           | 12 (3.0%)                           | 6 (5.6%)                              | 0.23                 | 1.93 (0.72-5.06)    |
| 72-hr return admission, n (%)       | 3 (25.0%)                           | 1 (16.7%)                             | > 0.99               | 0.60 (0.04-5.19)    |

<sup>a</sup> Time period when Delta variant was locally predominant: 5/30/2021 – 11/30/2021.

<sup>b</sup> Time period when Omicron variant was locally predominant: 12/1/2021 – 1/15/2022.

<sup>c</sup> Wilcoxon rank sum test for age; Fisher's exact test for other variables.

**Figure 1. Number of patients diagnosed with croup, number of patients diagnosed with parainfluenza, and community prevalence of spike gene target failure for SARS-CoV-2 (7-day rolling averages).**

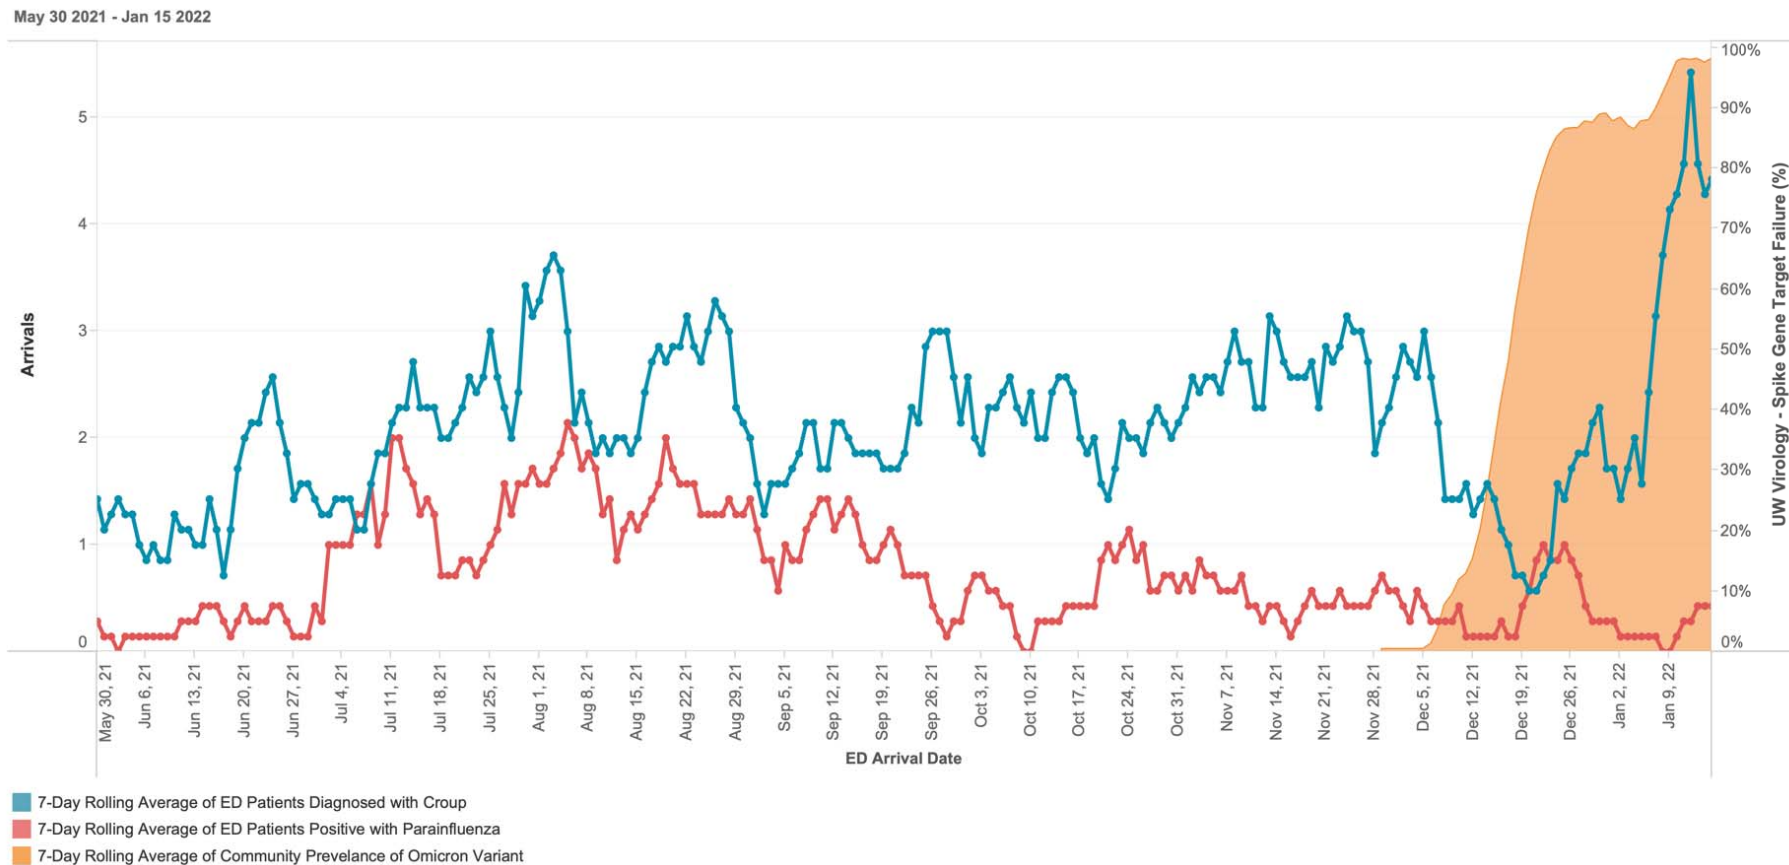

Source: https://medrxiv.org/content/10.1101/2022.02.02.22270222v2.full.pdf
